# Supplementary material for: Comparative Physiological and Transcriptomic Analyses Reveal Mechanisms of Exogenous Spermidine-Induced Tolerance to Low-Iron Stress in Solanum lycopersicum L
Source: MDPI journal article supplement (doi:10.3390/antiox11071260), 2022-06-27
Supplement: s1 [file s1]

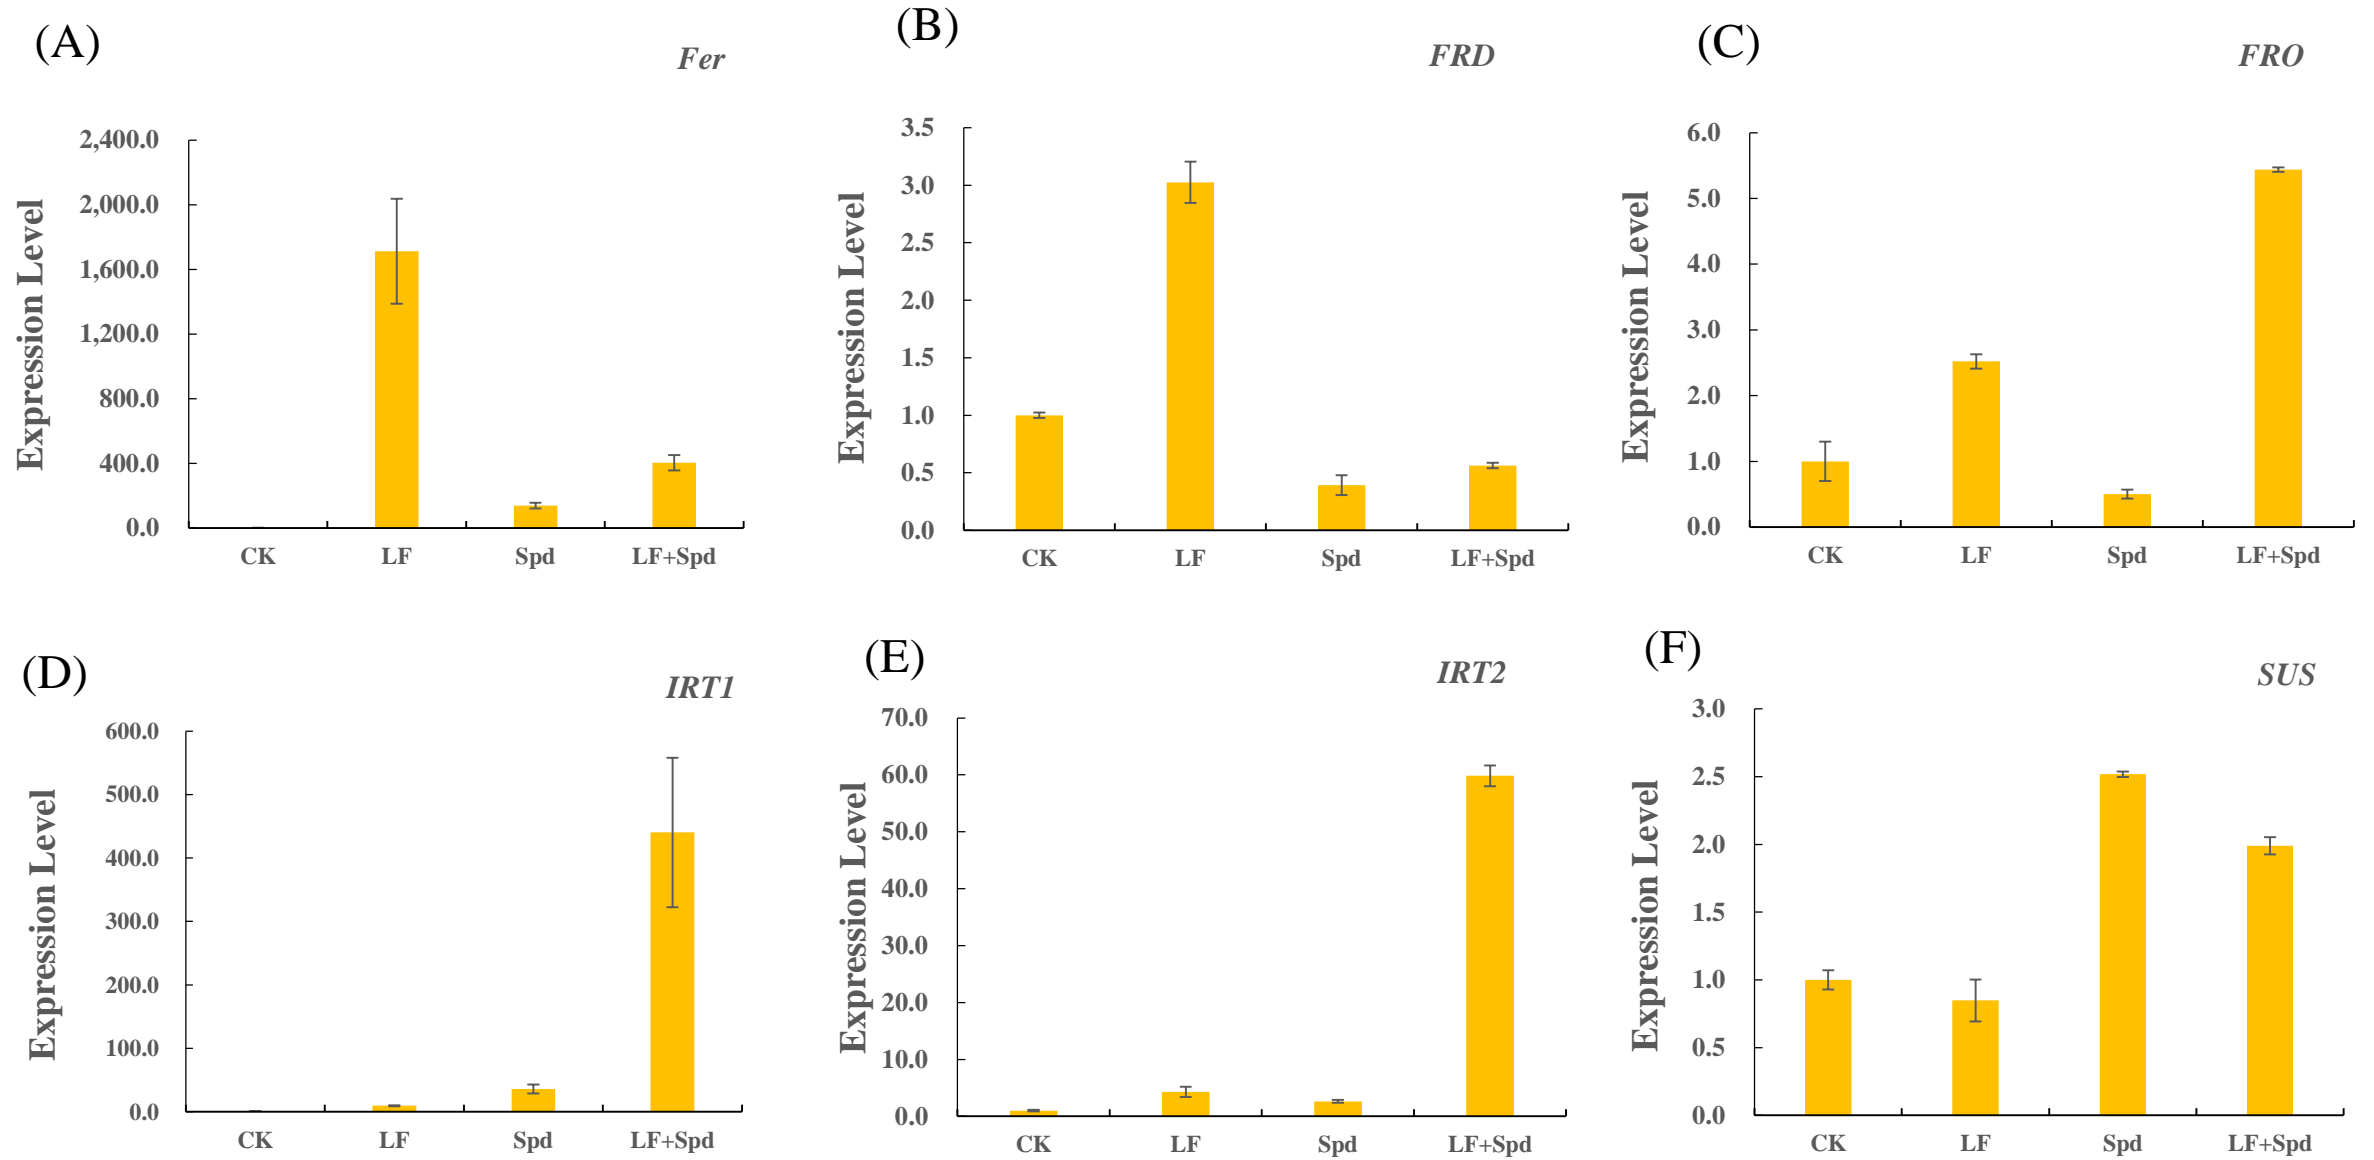

**Supplementary figure S1. The relative expression of selected differentially expressed genes verified by qRT-PCR.**

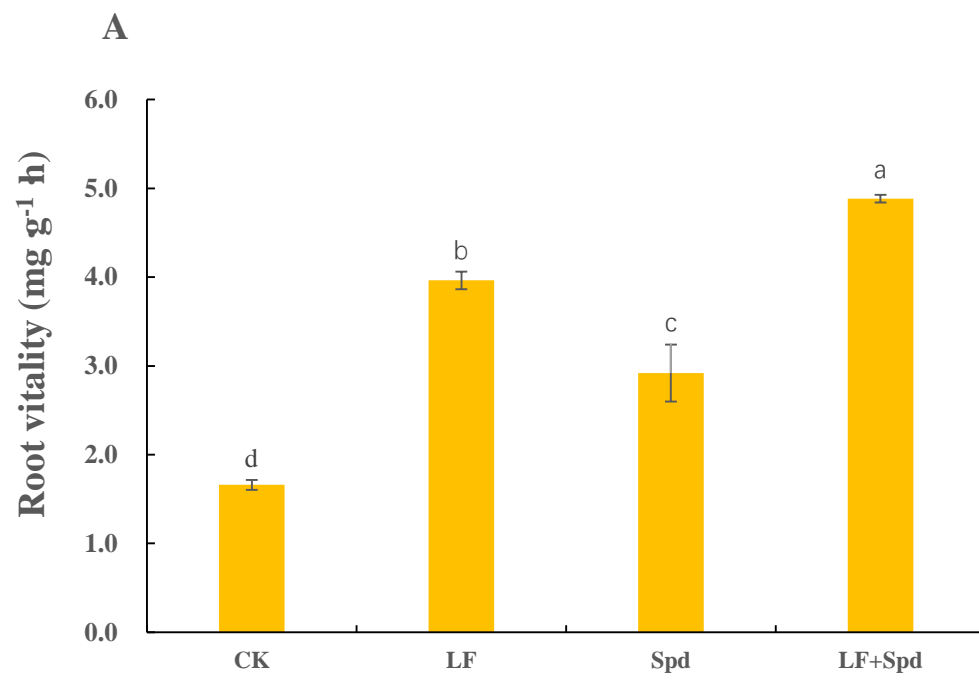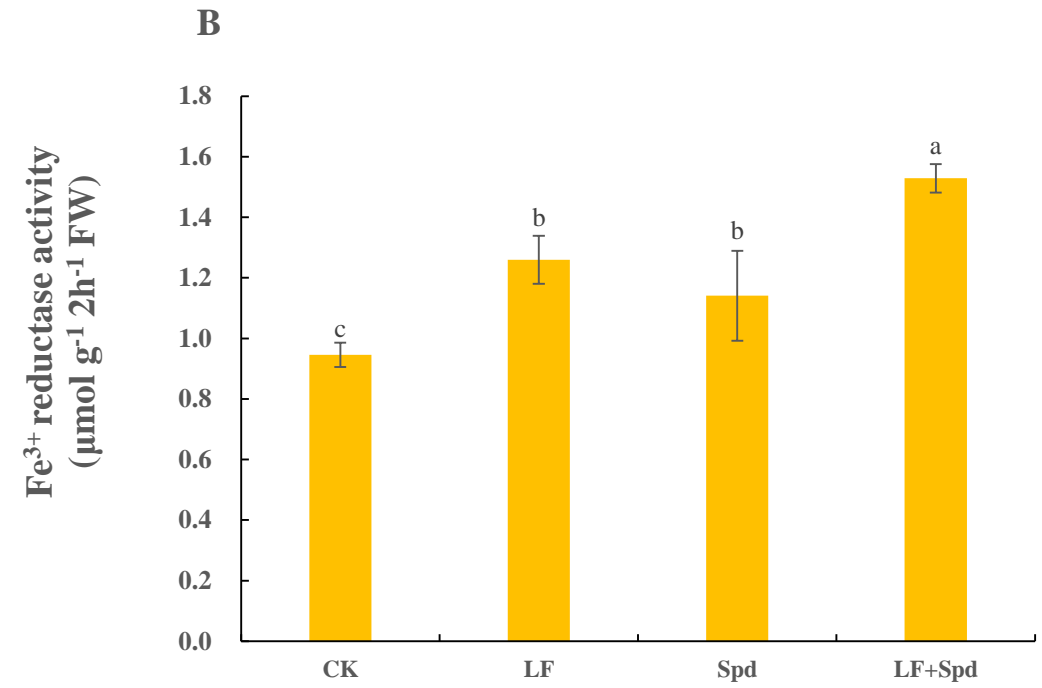

**Supplementary figure S2. Effect of exogenous Spd on (A) root vigor and (B)  $\text{Fe}^{3+}$  reductase activity of tomato under low iron stress.**

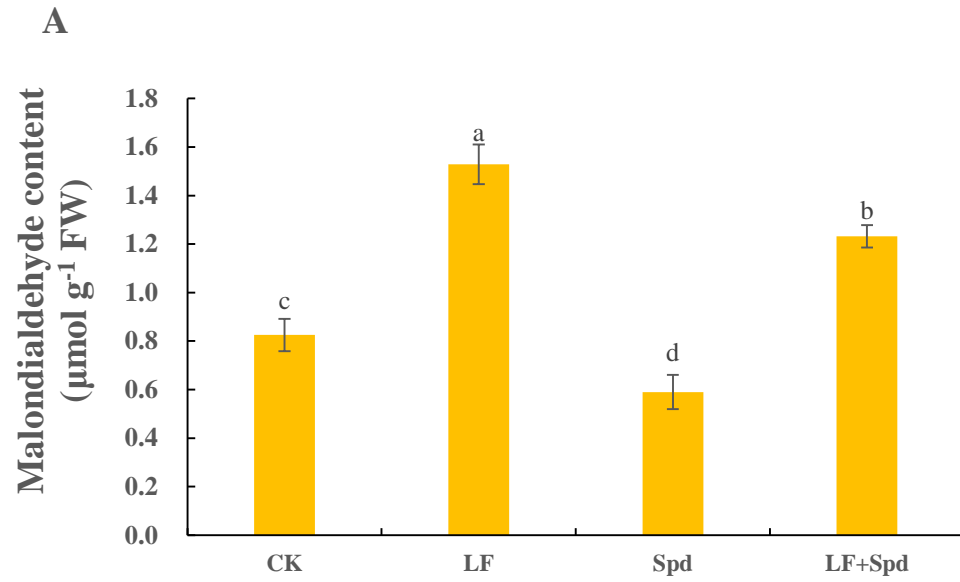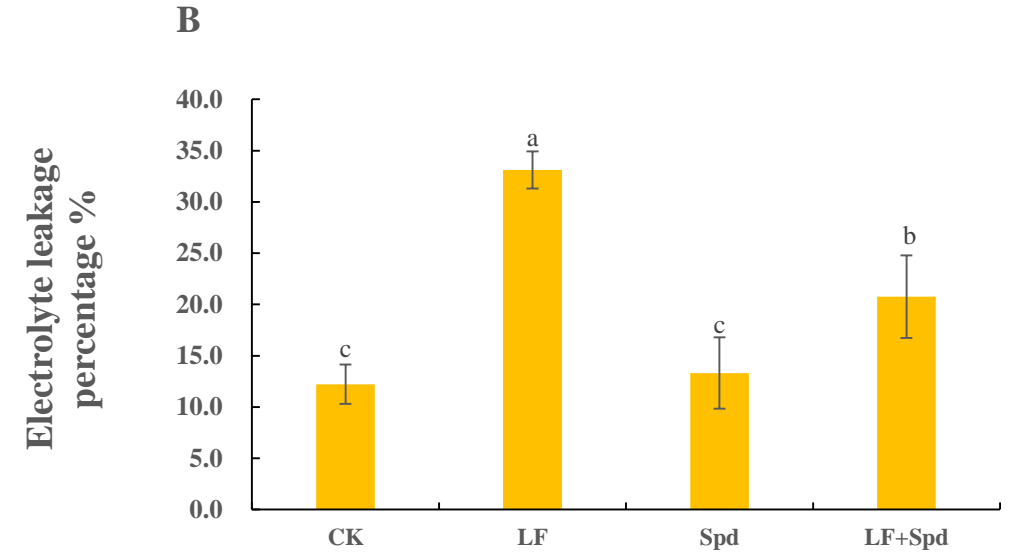

**Supplementary figure S3. Effect of exogenous Spd on lipid peroxidation (A) and ion leakage (B) in tomato roots under low iron stress.**
